# Supplementary material
Source: HighWire-hosted journal article supplement (https://jnm.snmjournals.org/highwire/filestream/95558/field_highwire_adjunct_files/0/227520_Supplemental_Data.pdf)

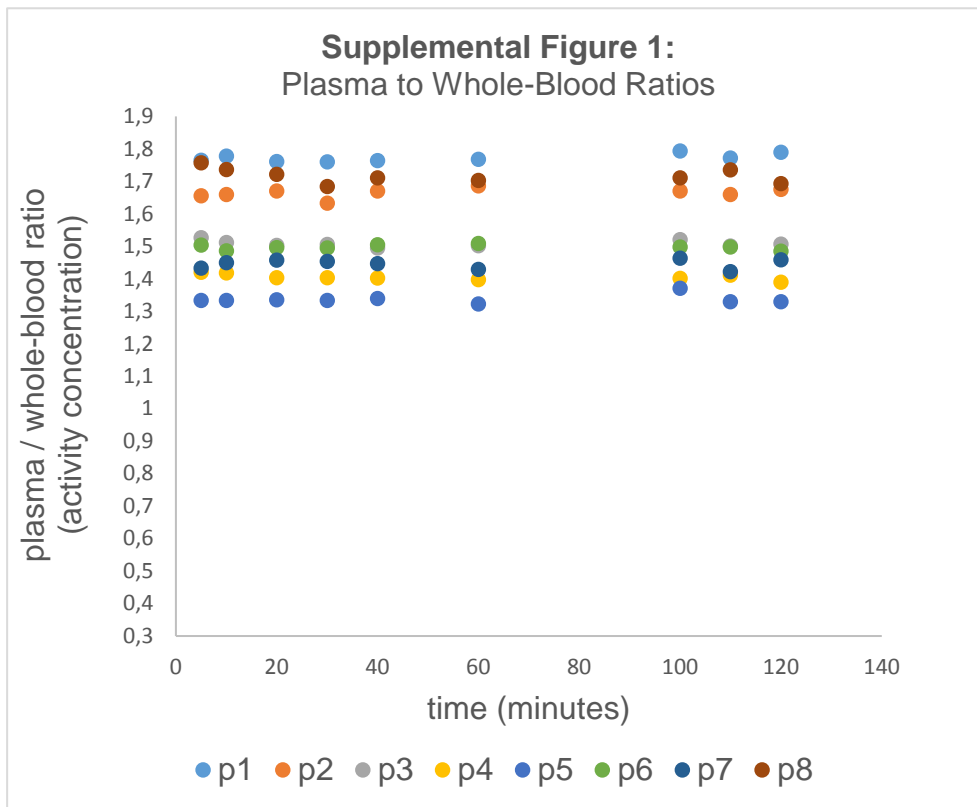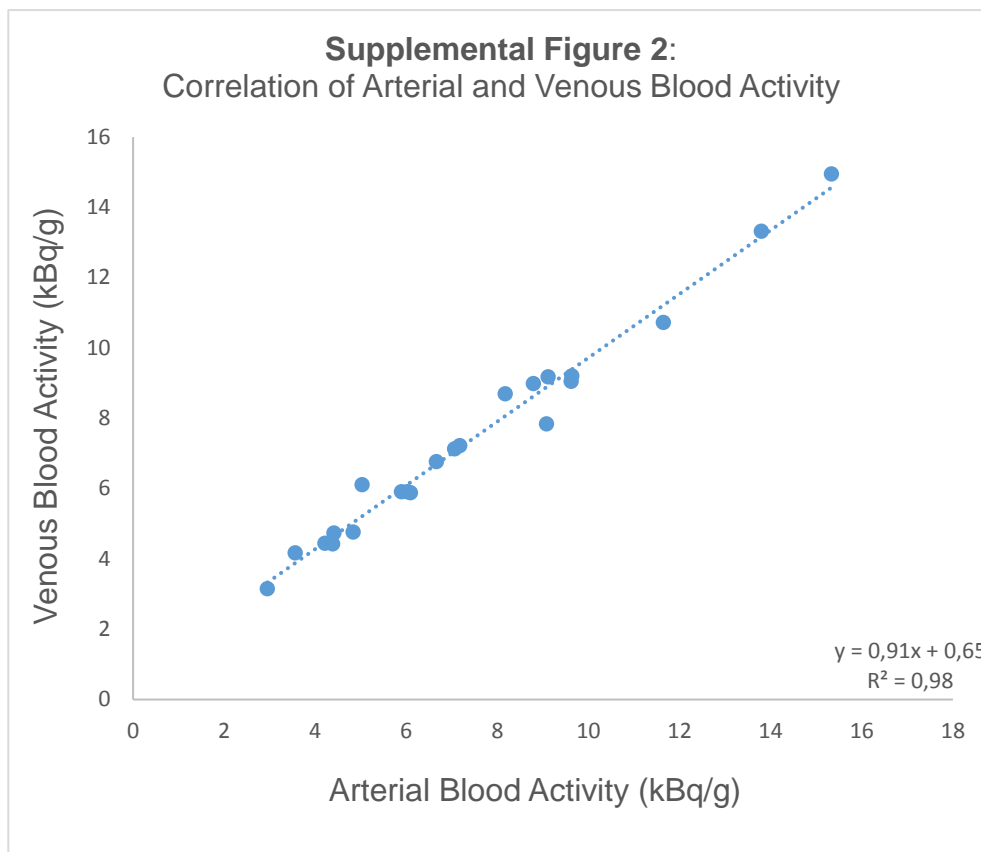

**Supplemental Figure 3:**  
Arterial Blood Activity Concentration

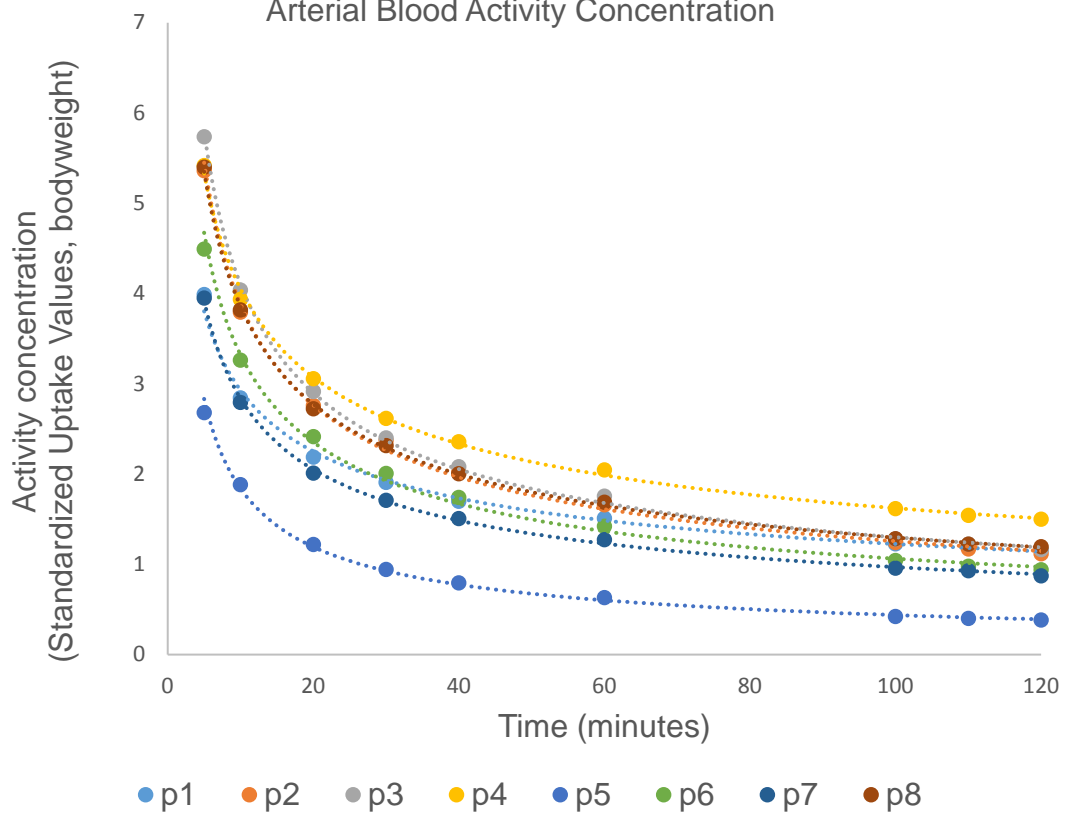

Supplement: 227520_Supplemental_Data.pdf [file 227520_Supplemental_Data.pdf]
